# Supplementary material for: Non-Isothermal Crystallization Kinetics of Montmorillonite/Polyamide 610 Nanocomposites
Source: MDPI journal article supplement (doi:10.3390/nano13121814), 2023-06-06
Supplement: s1 [file s1]

## SUPPORTING INFORMATION:

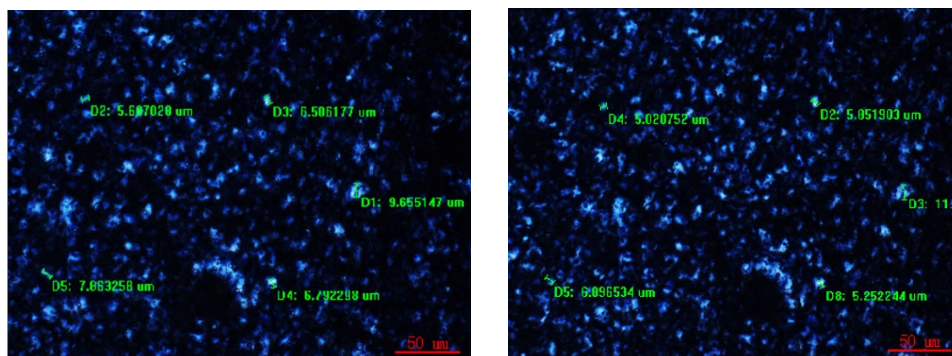

**Figure S1.** Transmission polarizing microscope of MMT/PA610 composite with  $w(\text{MMT})=3.0\%$  which slowly cools to (a) 30 °C, and (b) - 40 °C, respectively.

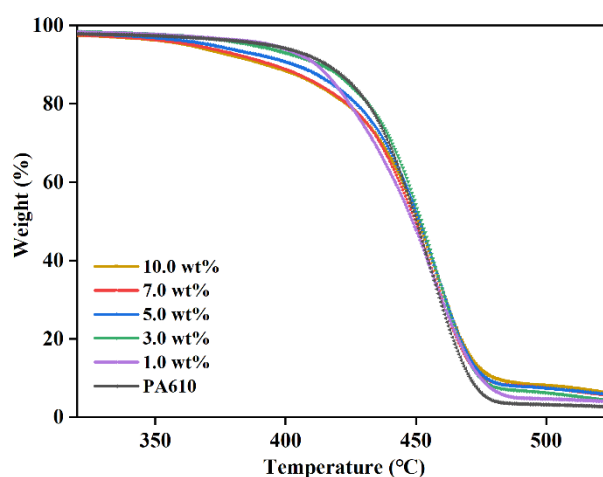

**Figure S2.** TG curves of: (a) pure PA610, and MMT/PA610 composite with (b)  $w(\text{MMT})=1.0\%$ , (c)  $w(\text{MMT})=3.0\%$ , (d)  $w(\text{MMT})=5.0\%$ , (e)  $w(\text{MMT})=7.0\%$ , (f)  $w(\text{MMT})=10.0\%$

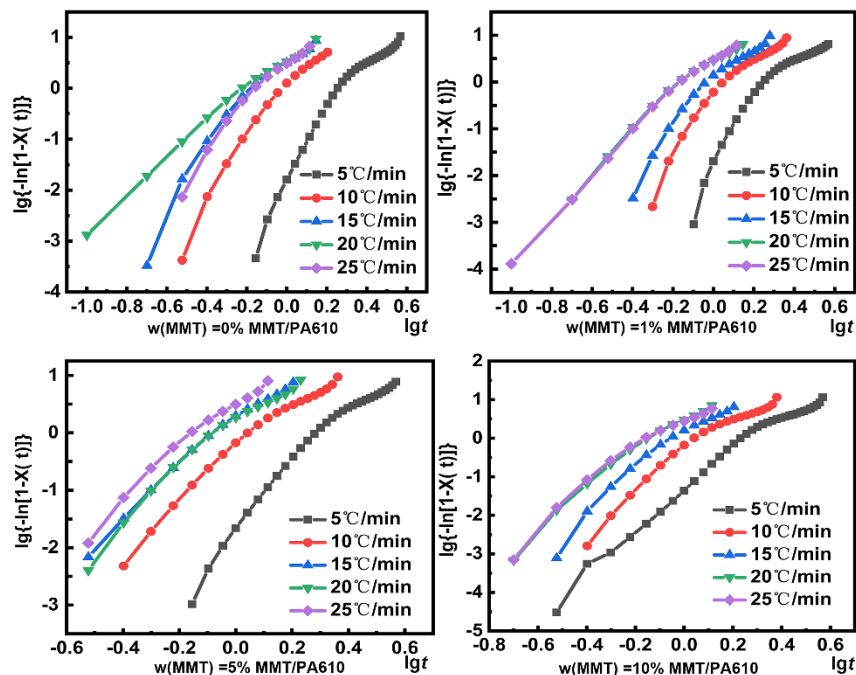

**Figure S3.** The Jeziorny method diagram of MMT/PA610 before optimization

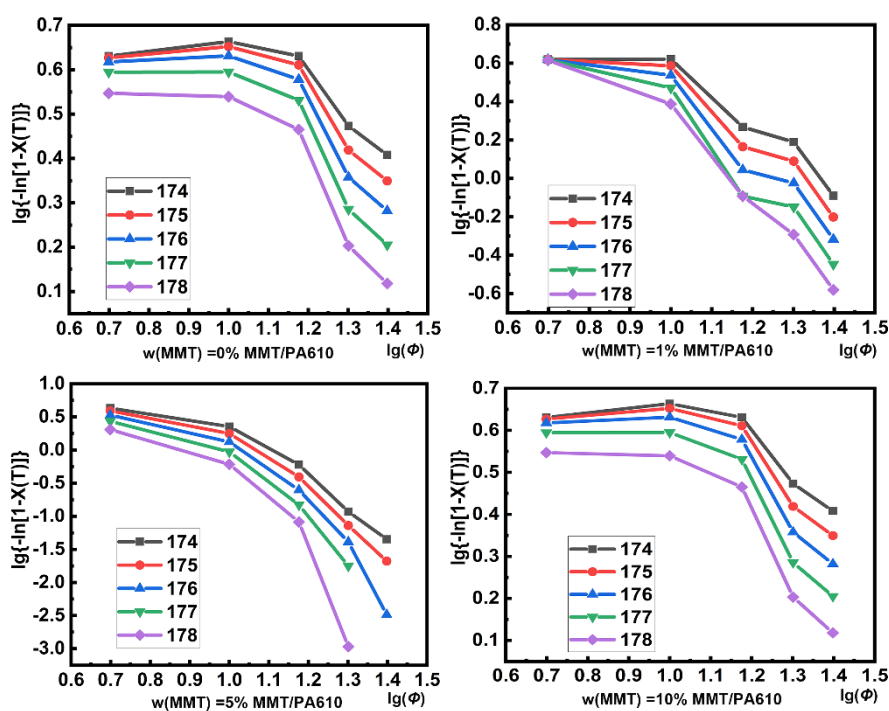

**Figure S4.** Ozawa method diagram of MMT/PA610 composite material

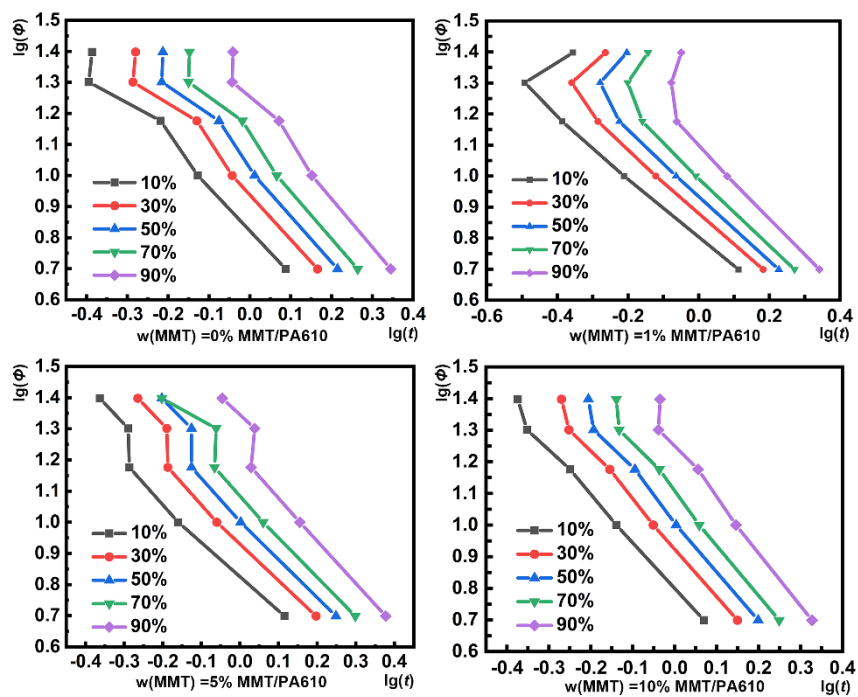

**Figure S5.** Mo method diagram of MMT/PA610 composite
